# Supplementary material for: How Does Aging Affect Social Attention? A Test of Competing Theories Using Multilevel Meta-Analysis
Source: PubMed Central journal article supplement (PMC9371458; doi:10.1093/geronb/gbac052), 2022-03-12
Supplement: gbac052_suppl_supplementary_material.pdf [file gbac052_suppl_supplementary_material.pdf]

**How Does Ageing Affect Social Attention? A Test of Competing Theories using Multi-  
Level Meta-Analysis**

**Supplemental Material**

## Table of Contents

|                                                                                                               |    |
|---------------------------------------------------------------------------------------------------------------|----|
| Supplement 1: Study Selection Processes                                                                       | 3  |
| Supplement 1a. Description of the Study Selection Process                                                     | 3  |
| Supplement 1b. Specific Reasons for the Exclusion of Citations that were Full Text Reviewed                   | 4  |
| Supplement 1c. Citations for Final Set of Included Papers/Theses                                              | 6  |
| Supplement 2: Details Regarding Effect Size Calculation Correlation Imputation                                | 7  |
| Supplement 3: All Included Gaze-Cueing Effects along with their Corresponding Sample and Task Characteristics | 8  |
| Supplement 4: <i>P</i> -Curve Disclosure Table                                                                | 13 |

## Supplement 1: Study Selection Processes

### Supplement 1a. Description of the Study Selection Process

#### *Database Searches*

A comprehensive systematic review was conducted as follows with the aim of ensuring the best chance of finding all relevant studies meeting the inclusion criteria. The study selection process is illustrated in Figure 1. In May 2021, title and abstract searches of Web of Science, PSYCINFO, PUBMED, and Scopus were completed using the terms (Ageing OR Aging OR Older) in combination with (Gaze OR Gazing) in combination with (Cues OR Cueing OR Cuing OR Cued). A total of 904 citations were uncovered. After removing 301 duplicates, the remaining 603 citations were screened independently by the first and fourth authors. This was done in duplication to ensure no eligible studies were excluded mistakenly. At this stage, citations were excluded for clear ineligibility. Any citation that at least one screener recommended full text review for was sent forward to the full text review stage. In total, 56 citations were sent forward to the full-text-review stage and reviewed against the inclusion criteria independently in duplicate by two reviewers (and assessed by a third reviewer whose decision was final if a disagreement arose). Forty-nine texts were excluded due to ineligibility against the inclusion criteria (see Supplemental Material 1 for text-specific reasons). In the end then, through database searches, 7 texts were determined to have at least one eligible gaze-cueing effect for younger and older adult samples (Bailey et al., 2014; Deroche et al., 2016; Gayzur et al., 2014; Nagy et al., 2020; Slessor et al., 2010; 2008; 2016).

#### *Additional Supplementary Searches*

To ensure recovery of all eligible texts, the first author completed forwards citations searches of 12 specific texts initially identified as eligible through the database searches as well as a backwards citations search of all papers cited in a recent review of gaze-cueing effects (McKay et al., *under review*). These additional searches can be considered an additional supplemental search completed with the intention of ensuring any eligible texts not picked up in the database searches would be identified and were preregistered prior to data extraction. PSYCinfo was used to retrieve the cited by list for each paper on 24 July, 2021. Citations were considered *possibly relevant* if the title mentioned use of older adult or lifespan samples or a clinical sample that would reasonably include older adult controls (e.g., dementia, stroke, etc.) as well as anything related to eye gaze. In total, 139 citations were identified. Of these, 96 were unique and retained for screening (see supplemental material for a list). Of these, 34 were considered potentially relevant. After cross checking with those already screened during the database search, 16 were novel citations. The abstracts of these 16 novel citations full texts were screened by the first author. One was determined to be eligible (Dalmaso et al., 2015). The backwards citations search of McKay et al. (*under review*) revealed one eligible novel citation (Insch, 2013). In the end then, a total of 9 eligible papers and theses were identified and included in the meta-analysis.

**Supplement 1b. Specific Reasons for the Exclusion of Citations that were Full Text Reviewed**

|                                                                                                                                              |                         |
|----------------------------------------------------------------------------------------------------------------------------------------------|-------------------------|
| Burra, N., Kerzel, D., de Gelder, B., & Pegna, A. J. (2014).                                                                                 | No younger adult sample |
| Insch, P. M., Slessor, G., Warrington, J., & Phillips, L. H. (2017).                                                                         | No younger adult sample |
| Kuhn, G., Pagano, A., Maani, S., & Bunce, D. (2015).                                                                                         | Data not available      |
| Petrican, R. (2012).                                                                                                                         | Data not available      |
| Petrican, R., English, T., Gross, J. J., Grady, C., Hai, T., & Moscovitch, M. (2012).                                                        | Data not available      |
| Akiyama, T., Kato, M., Muramatsu, T., Maeda, T., Tsunekatsu, H., & Kashima, H. (2008).                                                       | No older adult sample   |
| Akiyama, T., Kato, M., Muramatsu, T., Umeda, S., Saito, F., & Kashima, H. (2007).                                                            | No older adult sample   |
| Boll, S., Bartholomaeus, M., Peter, U., Lupke, U., & Gamer, M. (2016).                                                                       | No older adult sample   |
| Ciaro, F., De Angelis, J., Marino, B. F. M., Actis-Grosso, R., & Ricciardelli, P. (2021).                                                    | No older adult sample   |
| Dalmaso, M., Edwards, S. G., & Bayliss, A. P. (2015).                                                                                        | No older adult sample   |
| Magnée, M. J. C. M., Kahn, R. S., Cahn, W., & Kemner, C. (2011).                                                                             | No older adult sample   |
| Marotta, A., Casagrande, M., Rosa, C., Maccari, L., Berloca, B., & Pasini, A. (2014).                                                        | No older adult sample   |
| Okada, T., Sato, W., Kubota, Y., Usui, K., Inoue, Y., Murai, T., Hayashi, T., & Toichi, M. (2008).                                           | No older adult sample   |
| Redcay, E., Kleiner, M., & Saxe, R. (2012).                                                                                                  | No older adult sample   |
| Rigato, S., Menon, E., Di Gangi, V., George, N., & Farroni, T. (2013).                                                                       | No older adult sample   |
| Sato, W., Uono, S., Okada, T., & Toichi, M. (2010).                                                                                          | No older adult sample   |
| Saunders, K. E. A., Goodwin, G. M., & Rogers, R. D. (2015).                                                                                  | No older adult sample   |
| Uono, S., Sato, W., & Toichi, M. (2009).                                                                                                     | No older adult sample   |
| Berchio, C., Küng, A., Kumar, S., Cordera, P., Dayer, A. G., Aubry, J., Michel, C. M., & Piguet, C. (2019).                                  | No gaze-cueing task     |
| Bertsch, K., Gamer, M., Schmidt, B., Schmidinger, I., Walther, S., Kästel, T., Schnell, K., Büchel, C., Domes, G., & Herpertz, S. C. (2013). | No gaze-cueing task     |
| Campbell, A., Murray, J. E., Atkinson, L., & Ruffman, T. (2017).                                                                             | No gaze-cueing task     |
| Caruana, N., Ham, H. S., Brock, J., Woolgar, A., Kloth, N., Palermo, R., & McArthur, G. (2017).                                              | No gaze-cueing task     |
| Fernandes, E. G., Phillips, L. H., Slessor, G., & Tatler, B. W. (2021).                                                                      | No gaze-cueing task     |
| Freebody, S., & Kuhn, G. (2016).                                                                                                             | No gaze-cueing task     |
| Gaál, Z. A., Nagy, B., File, D., & Czigler, I. (2020).                                                                                       | No gaze-cueing task     |
| Gazes, Y., Habeck, C., O'Shea, D., Razlighi, Q. R., Steffener, J., Stern, Y. (2015).                                                         | No gaze-cueing task     |

|                                                                                                                                                            |                                                       |
|------------------------------------------------------------------------------------------------------------------------------------------------------------|-------------------------------------------------------|
| Grainger, S. A., Henry, J. D., Phillips, L. H., Vanman, E. J., & Allen, R. (2017).                                                                         | No gaze-cueing task                                   |
| Grainger, S. A., Steinvik, H. R., Henry, J. D., & Phillips, L. H. (2019).                                                                                  | No gaze-cueing task                                   |
| Jimenez, S., Hollands, M., Palmisano, S., Kim, J., Markoulli, M., McAndrew, D., Stamenkovic, A., Walsh, J., Bos, S., & Stapley, P.J. (2016).               | No gaze-cueing task                                   |
| Morehouse, S. A. (2000).                                                                                                                                   | No gaze-cueing task                                   |
| Noh, S. R., Lohani, M., & Isaacowitz, D. M. (2011).                                                                                                        | No gaze-cueing task                                   |
| Ossenfort, K. (2021).                                                                                                                                      | No gaze-cueing task                                   |
| Redcay, E., Ludlum, R.S., Velnoskey, K.R., & Kanwal, S. (2016).                                                                                            | No gaze-cueing task                                   |
| Richard-Mornas, A., Borg, C., Klein-Koerkamp, Y., Paignon, A., Hot, P., Thomas-Antérion, C. (2012).                                                        | No gaze-cueing task                                   |
| Seitz, K. I., Leitenstorfer, J., Krauch, M., Hillmann, K., Boll, S., Ueltzhoeffer, K., Neukel, C., Kleindienst, N., Herpertz, S. C., & Bertsch, K. (2021). | No gaze-cueing task                                   |
| Seya, Y., Tsutsui, K., Watanabe, K., & Kimura, K. (2012).                                                                                                  | No gaze-cueing task                                   |
| Sheldon, S., Quint, J., Hecht, H., & Bowers, A.R. (2014).                                                                                                  | No gaze-cueing task                                   |
| Slessor, G., Phillips, L.H., & Bull, R. (2010).                                                                                                            | No gaze-cueing task                                   |
| Slessor, G., Phillips, L.H., & Bull, R. (2010).                                                                                                            | No gaze-cueing task                                   |
| Slessor, G., Riby, D. M., & Finnerty, A. N. (2013).                                                                                                        | No gaze-cueing task                                   |
| Vicaria, I. M., Bernieri, F. J., & Isaacowitz, D. M. (2015).                                                                                               | No gaze-cueing task                                   |
| Vlamings, P. H. J. M., Stayder, J. E. A., van Son, I. A. M., & Mottron, L. (2005).                                                                         | No gaze-cueing task                                   |
| Xing, C. (2009).                                                                                                                                           | No gaze-cueing task                                   |
| Ziaei, M., Burianová, H., von Hippel, W., Ebner, N.C., Phillips, L.H., & Henry, J.D. (2016).                                                               | No gaze-cueing task                                   |
| Slessor, G., Laird, G., Phillips, L. H., Bull, R., & Filippou, D. (2010).                                                                                  | Duplicate citation not detected at abstract screening |
| Tofield, M. I., & Wann, J. P. (2002).                                                                                                                      | Full text not available                               |
| Chen, S. R., & Li, J. L. (2019).                                                                                                                           | Full text not available                               |
| Gayzur, N., Langley, L., Wyman, S. V., Saville, A., & Friesen, C. (2011).                                                                                  | Full text not available                               |
| McCade, D. L., Guastella, A. J., Chen, N. T. M., Lewis, S. J. G., & Naismith, S. L.                                                                        | Full text not available                               |

### Supplement 1c. Citations for Final Set of Included Papers

Bailey, P. E., Slessor, G., Rendell, P. G., Bennetts, R. J., Campbell, A., & Ruffman, T. (2014). Age differences in conscious versus subconscious social perception: The influence of face age and valence on gaze following. *Psychology and Aging, 29*(3), 491-502. <http://doi.org/10.1037/a0036249>

Dalmaso, M., Castelli, L., Priftis, K., Buccheri, M., Primon, D., Tronco, S., & Galfano, G. (2015). Space-based and object-centred gaze cuing of attention in right hemisphere-damaged patients. *Frontiers in Psychology, 6*, 1119. <http://doi.org/10.3389/fpsyg.2015.01119>

Deroche, T., Castanier, C., Perrot, A., Hartley, A. (2016). Joint attention is slowed in older adults. *Experimental Aging Research, 42*(2), 144-150. <http://doi.org/10.1080/0361073X.2016.1132826>

Gayzur, N. D., Langley, L. K., Kelland, C., Wyman, S. V., Saville, A. L., Ciernia, A. T., & Padmanabhan, G. (2014). Reflexive orienting in response to short- and long-duration gaze cues in young, young-old, and old-old adults. *Attention, Perception, and Psychophysics, 76*, 407-419. <http://doi.org/10.3758/s13414-013-0554-6>

Insch, P. M. (2013). Exploring the impact of aging and dementia on the precursors to theory of mind (unpublished doctoral thesis). University of Aberdeen, Scotland used predictive gaze cues.

Nagy, B., Czigler, I., File, D., & Gaál, Z. A. (2020). Can irrelevant but salient visual cues compensate for the age-related decline in cognitive conflict resolution?—An ERP study. *PLoS ONE, 15*(5). <http://doi.org/10.1371/journal.pone.0233496>

Slessor, G., Laird, G., Phillips, L. H., Bull, R., & Filippou, D. (2010). Age-related differences in gaze following: Does the age of the face matter? *Journal of Gerontology: Psychological Sciences, 65B*(5), 536-541. <http://doi.org/10.1093/geronb/gbq038>

Slessor, G., Phillips, L. H., & Bull, R. (2008). Age-related declines in basic social perception: Evidence from tasks assessing eye-gaze processing. *Psychology and Aging, 23*(4), 812-822. <http://doi.org/10.1037/a0014348>

Slessor, G., Venturini, C., Bonny, E. J., Insch, P. M., Rokaszewicz, A., & Finnerty, A. N. (2016). Specificity of age-related differences in eye-gaze following: Evidence from social and nonsocial stimuli. *Journals of Gerontology: Psychological Sciences, 71*(1), 11-22. <http://doi.org/10.1093/geronb/gbu088>

## Supplement 2: Details Regarding Effect Size Calculation Correlation Imputation

We expected to have to impute the correlation between gaze-cued and gaze-miscued trials due to a lack of reporting of this variable. For this, we extracted the gaze-cued to gaze-miscued correlation wherever possible and computed a multi-level meta-analytic correlation coefficient for use as a representative correlation for imputation where this value is missing. We were able to extract valid-invalid correlations associated with 20 gaze-cueing effects from six samples comprising 210 participants. The meta-analytic point estimate of the valid-invalid correlation was  $r = .93$ , 95% CI [.72, .98]. We used the correlation to 6 decimal places for precision. It was  $r = .929433$ . This is a typical magnitude for a pre-post correlation (Estrada et al., 2019).

Estrada, E., Ferrer, E., & Pardo, A. (2019). Statistics for evaluating pre-post change: Relation between change in the distribution center and change in the individual scores. *Frontiers in Psychology*, 9(2696). <http://doi.org/10.3389/fpsyg.2018.02696>

**Supplement 3. All Included Gaze-Cueing Effects along with their Corresponding  
Sample and Task Characteristics**



| Citation              | Sample Characteristics <sup>1</sup> |                |          |                    |              |             | Effect Characteristics and Moderators of Interest |                 |                |              |                            |                           |         |
|-----------------------|-------------------------------------|----------------|----------|--------------------|--------------|-------------|---------------------------------------------------|-----------------|----------------|--------------|----------------------------|---------------------------|---------|
|                       | Author/s (year)                     | <i>k</i><br>ID | <i>N</i> | Female<br><i>N</i> | Age<br>Group | Mean<br>Age | Country<br>Study<br>Conducted<br>In               | <i>ES</i><br>ID | Predictiveness | Face<br>Type | Cue-<br>Target<br>SOA (ms) | Task<br>Type <sup>2</sup> | Emotion |
| Bailey et al. (2014)  | 1                                   | 31             | nr       | young              | nr           | Australia   | 1                                                 | nonpredictive   | real           | 200          | local                      | neutral                   | 0.16    |
| Bailey et al. (2014)  | 1                                   | 31             | nr       | young              | nr           | Australia   | 2                                                 | nonpredictive   | real           | 200          | local                      | neutral                   | 0.08    |
| Bailey et al. (2014)  | 1                                   | 31             | nr       | young              | nr           | Australia   | 3                                                 | nonpredictive   | real           | 200          | local                      | neutral                   | 0.16    |
| Bailey et al. (2014)  | 1                                   | 31             | nr       | young              | nr           | Australia   | 4                                                 | nonpredictive   | real           | 200          | local                      | neutral                   | 0.30    |
| Bailey et al. (2014)  | 2                                   | 31             | nr       | older              | nr           | Australia   | 5                                                 | nonpredictive   | real           | 200          | local                      | neutral                   | 0.06    |
| Bailey et al. (2014)  | 2                                   | 31             | nr       | older              | nr           | Australia   | 6                                                 | nonpredictive   | real           | 200          | local                      | neutral                   | 0.09    |
| Bailey et al. (2014)  | 2                                   | 31             | nr       | older              | nr           | Australia   | 7                                                 | nonpredictive   | real           | 200          | local                      | neutral                   | -0.04   |
| Bailey et al. (2014)  | 2                                   | 31             | nr       | older              | nr           | Australia   | 8                                                 | nonpredictive   | real           | 200          | local                      | neutral                   | 0.43    |
| Bailey et al. (2014)  | 3                                   | 32             | nr       | young              | nr           | Australia   | 9                                                 | nonpredictive   | real           | 200          | local                      | happy                     | 0.26    |
| Bailey et al. (2014)  | 3                                   | 32             | nr       | young              | nr           | Australia   | 10                                                | nonpredictive   | real           | 200          | local                      | fearful                   | 0.22    |
| Bailey et al. (2014)  | 3                                   | 32             | nr       | young              | nr           | Australia   | 11                                                | nonpredictive   | real           | 200          | local                      | happy                     | 0.28    |
| Bailey et al. (2014)  | 3                                   | 32             | nr       | young              | nr           | Australia   | 12                                                | nonpredictive   | real           | 200          | local                      | fearful                   | 0.18    |
| Bailey et al. (2014)  | 3                                   | 32             | nr       | young              | nr           | Australia   | 13                                                | nonpredictive   | real           | 200          | local                      | happy                     | 0.08    |
| Bailey et al. (2014)  | 3                                   | 32             | nr       | young              | nr           | Australia   | 14                                                | nonpredictive   | real           | 200          | local                      | fearful                   | 0.06    |
| Bailey et al. (2014)  | 3                                   | 32             | nr       | young              | nr           | Australia   | 15                                                | nonpredictive   | real           | 200          | local                      | happy                     | 0.30    |
| Bailey et al. (2014)  | 3                                   | 32             | nr       | young              | nr           | Australia   | 16                                                | nonpredictive   | real           | 200          | local                      | fearful                   | 0.13    |
| Bailey et al. (2014)  | 4                                   | 30             | nr       | older              | nr           | Australia   | 17                                                | nonpredictive   | real           | 200          | local                      | happy                     | 0.03    |
| Bailey et al. (2014)  | 4                                   | 30             | nr       | older              | nr           | Australia   | 18                                                | nonpredictive   | real           | 200          | local                      | fearful                   | 0.11    |
| Bailey et al. (2014)  | 4                                   | 30             | nr       | older              | nr           | Australia   | 19                                                | nonpredictive   | real           | 200          | local                      | happy                     | 0.06    |
| Bailey et al. (2014)  | 4                                   | 30             | nr       | older              | nr           | Australia   | 20                                                | nonpredictive   | real           | 200          | local                      | fearful                   | 0.05    |
| Bailey et al. (2014)  | 4                                   | 30             | nr       | older              | nr           | Australia   | 21                                                | nonpredictive   | real           | 200          | local                      | happy                     | 0.04    |
| Bailey et al. (2014)  | 4                                   | 30             | nr       | older              | nr           | Australia   | 22                                                | nonpredictive   | real           | 200          | local                      | fearful                   | 0.12    |
| Bailey et al. (2014)  | 4                                   | 30             | nr       | older              | nr           | Australia   | 23                                                | nonpredictive   | real           | 200          | local                      | happy                     | 0.05    |
| Bailey et al. (2014)  | 4                                   | 30             | nr       | older              | nr           | Australia   | 24                                                | nonpredictive   | real           | 200          | local                      | fearful                   | 0.08    |
| Deroche et al. (2016) | 5                                   | 43             | 20       | older              | 69.16        | France      | 25                                                | nonpredictive   | generated      | 100          | local                      | neutral                   | 0.00    |
| Deroche et al. (2016) | 5                                   | 43             | 20       | older              | 69.16        | France      | 26                                                | nonpredictive   | generated      | 300          | local                      | neutral                   | 0.15    |
| Deroche et al. (2016) | 5                                   | 43             | 20       | older              | 69.16        | France      | 27                                                | nonpredictive   | generated      | 600          | local                      | neutral                   | 0.43    |
| Deroche et al. (2016) | 5                                   | 43             | 20       | older              | 69.16        | France      | 28                                                | nonpredictive   | generated      | 1000         | local                      | neutral                   | 0.14    |
| Deroche et al. (2016) | 6                                   | 43             | 22       | young              | 24.05        | France      | 29                                                | nonpredictive   | generated      | 100          | local                      | neutral                   | 0.28    |
| Deroche et al. (2016) | 6                                   | 43             | 22       | young              | 24.05        | France      | 30                                                | nonpredictive   | generated      | 300          | local                      | neutral                   | 0.36    |
| Deroche et al. (2016) | 6                                   | 43             | 22       | young              | 24.05        | France      | 31                                                | nonpredictive   | generated      | 600          | local                      | neutral                   | 0.18    |
| Deroche et al. (2016) | 6                                   | 43             | 22       | young              | 24.05        | France      | 32                                                | nonpredictive   | generated      | 1000         | local                      | neutral                   | 0.00    |

|                      |    |    |    |       |      |               |    |               |           |      |       |         |      |
|----------------------|----|----|----|-------|------|---------------|----|---------------|-----------|------|-------|---------|------|
| Gayzur et al. (2014) | 7  | 40 | 24 | young | 20.3 | United States | 33 | nonpredictive | schematic | 100  | local | neutral | 0.29 |
| Gayzur et al. (2014) | 7  | 40 | 24 | young | 20.3 | United States | 34 | nonpredictive | schematic | 300  | local | neutral | 0.12 |
| Gayzur et al. (2014) | 7  | 40 | 24 | young | 20.3 | United States | 35 | nonpredictive | schematic | 600  | local | neutral | 0.15 |
| Gayzur et al. (2014) | 7  | 40 | 24 | young | 20.3 | United States | 36 | nonpredictive | schematic | 1000 | local | neutral | 0.11 |
| Gayzur et al. (2014) | 8  | 40 | 25 | older | 66.6 | United States | 37 | nonpredictive | schematic | 100  | local | neutral | 0.29 |
| Gayzur et al. (2014) | 8  | 40 | 25 | older | 66.6 | United States | 38 | nonpredictive | schematic | 300  | local | neutral | 0.22 |
| Gayzur et al. (2014) | 8  | 40 | 25 | older | 66.6 | United States | 39 | nonpredictive | schematic | 600  | local | neutral | 0.01 |
| Gayzur et al. (2014) | 8  | 40 | 25 | older | 66.6 | United States | 40 | nonpredictive | schematic | 1000 | local | neutral | 0.16 |
| Gayzur et al. (2014) | 9  | 40 | 25 | older | 78.9 | United States | 41 | nonpredictive | schematic | 100  | local | neutral | 0.06 |
| Gayzur et al. (2014) | 9  | 40 | 25 | older | 78.9 | United States | 42 | nonpredictive | schematic | 300  | local | neutral | 0.25 |
| Gayzur et al. (2014) | 9  | 40 | 25 | older | 78.9 | United States | 43 | nonpredictive | schematic | 600  | local | neutral | 0.07 |
| Gayzur et al. (2014) | 9  | 40 | 25 | older | 78.9 | United States | 44 | nonpredictive | schematic | 1000 | local | neutral | 0.01 |
| Gayzur et al. (2014) | 10 | 40 | 27 | young | 20.2 | United States | 45 | nonpredictive | schematic | 100  | local | neutral | 0.31 |
| Gayzur et al. (2014) | 10 | 40 | 27 | young | 20.2 | United States | 46 | nonpredictive | schematic | 300  | local | neutral | 0.23 |
| Gayzur et al. (2014) | 10 | 40 | 27 | young | 20.2 | United States | 47 | nonpredictive | schematic | 600  | local | neutral | 0.05 |
| Gayzur et al. (2014) | 10 | 40 | 27 | young | 20.2 | United States | 48 | nonpredictive | schematic | 1000 | local | neutral | 0.07 |
| Gayzur et al. (2014) | 11 | 40 | 27 | older | 67   | United States | 49 | nonpredictive | schematic | 100  | local | neutral | 0.18 |
| Gayzur et al. (2014) | 11 | 40 | 27 | older | 67   | United States | 50 | nonpredictive | schematic | 300  | local | neutral | 0.15 |
| Gayzur et al. (2014) | 11 | 40 | 27 | older | 67   | United States | 51 | nonpredictive | schematic | 600  | local | neutral | 0.07 |

|                       |    |    |    |       |       |                |    |               |           |      |       |                  |       |
|-----------------------|----|----|----|-------|-------|----------------|----|---------------|-----------|------|-------|------------------|-------|
| Gayzur et al. (2014)  | 11 | 40 | 27 | older | 67    | United States  | 52 | nonpredictive | schematic | 1000 | local | neutral          | 0.05  |
| Gayzur et al. (2014)  | 12 | 40 | 27 | older | 79.6  | United States  | 53 | nonpredictive | schematic | 100  | local | neutral          | 0.16  |
| Gayzur et al. (2014)  | 12 | 40 | 27 | older | 79.6  | United States  | 54 | nonpredictive | schematic | 300  | local | neutral          | 0.19  |
| Gayzur et al. (2014)  | 12 | 40 | 27 | older | 79.6  | United States  | 55 | nonpredictive | schematic | 600  | local | neutral          | 0.03  |
| Gayzur et al. (2014)  | 12 | 40 | 27 | older | 79.6  | United States  | 56 | nonpredictive | schematic | 1000 | local | neutral          | 0.05  |
| Nagy et al. (2020)    | 13 | 24 | 12 | young | 22    | Hungary        | 57 | nonpredictive | real      | 150  | categ | Neutral or happy | -0.19 |
| Nagy et al. (2020)    | 14 | 20 | nr | older | nr    | Hungary        | 58 | nonpredictive | real      | 150  | categ | Neutral or happy | -0.14 |
| Slessor et al. (2010) | 15 | 30 | 23 | young | 20.09 | United Kingdom | 59 | nonpredictive | real      | 500  | local | neutral          | 0.28  |
| Slessor et al. (2010) | 15 | 30 | 23 | young | 20.09 | United Kingdom | 60 | nonpredictive | real      | 500  | local | neutral          | 0.17  |
| Slessor et al. (2010) | 16 | 29 | 21 | older | 73.59 | United Kingdom | 61 | nonpredictive | real      | 500  | local | neutral          | 0.06  |
| Slessor et al. (2010) | 16 | 29 | 21 | older | 73.59 | United Kingdom | 62 | nonpredictive | real      | 500  | local | neutral          | 0.08  |
| Slessor et al. (2008) | 17 | 45 | 36 | young | 20.02 | United Kingdom | 63 | predictive    | real      | 180  | local | happy            | 0.69  |
| Slessor et al. (2008) | 17 | 45 | 36 | young | 20.02 | United Kingdom | 64 | predictive    | real      | 180  | local | sad              | 0.71  |
| Slessor et al. (2008) | 17 | 45 | 36 | young | 20.02 | United Kingdom | 65 | predictive    | real      | 180  | local | fearful          | 0.67  |
| Slessor et al. (2008) | 17 | 45 | 36 | young | 20.02 | United Kingdom | 66 | predictive    | real      | 180  | local | angry            | 0.82  |
| Slessor et al. (2008) | 17 | 45 | 36 | young | 20.02 | United Kingdom | 67 | predictive    | real      | 180  | local | neutral          | 0.82  |
| Slessor et al. (2008) | 18 | 36 | 27 | older | 72.11 | United Kingdom | 68 | predictive    | real      | 180  | local | happy            | 0.09  |
| Slessor et al. (2008) | 18 | 36 | 27 | older | 72.11 | United Kingdom | 69 | predictive    | real      | 180  | local | sad              | 0.09  |
| Slessor et al. (2008) | 18 | 36 | 27 | older | 72.11 | United Kingdom | 70 | predictive    | real      | 180  | local | fearful          | 0.17  |

|                       |    |    |    |       |       |                |    |               |           |     |        |         |      |
|-----------------------|----|----|----|-------|-------|----------------|----|---------------|-----------|-----|--------|---------|------|
| Slessor et al. (2008) | 18 | 36 | 27 | older | 72.11 | United Kingdom | 71 | predictive    | real      | 180 | local  | angry   | 0.16 |
| Slessor et al. (2008) | 18 | 36 | 27 | older | 72.11 | United Kingdom | 72 | predictive    | real      | 180 | local  | neutral | 0.19 |
| Slessor et al. (2016) | 19 | 41 | 37 | young | 20.67 | United Kingdom | 73 | predictive    | real      | 220 | local  | neutral | 0.64 |
| Slessor et al. (2016) | 19 | 41 | 37 | young | 20.67 | United Kingdom | 74 | nonpredictive | real      | 220 | local  | neutral | 0.44 |
| Slessor et al. (2016) | 20 | 34 | 28 | older | 72.71 | United Kingdom | 75 | predictive    | real      | 220 | local  | neutral | 0.09 |
| Slessor et al. (2016) | 20 | 34 | 28 | older | 72.71 | United Kingdom | 76 | nonpredictive | real      | 220 | local  | neutral | 0.08 |
| Slessor et al. (2016) | 21 | 46 | 36 | young | 21.02 | United Kingdom | 77 | predictive    | real      | 220 | local  | neutral | 0.97 |
| Slessor et al. (2016) | 22 | 44 | 37 | older | 72.64 | United Kingdom | 78 | predictive    | real      | 220 | local  | neutral | 0.07 |
| Dalmaso et al. (2015) | 23 | 26 | 21 | young | 19.27 | Italy          | 79 | nonpredictive | generated | 500 | detect | neutral | 0.13 |
| Dalmaso et al. (2015) | 24 | 9  | 3  | older | 63.11 | Italy          | 80 | nonpredictive | generated | 500 | detect | neutral | 0.13 |
| Insch (2013)          | 25 | 40 | 29 | young | 20.9  | United Kingdom | 81 | predictive    | real      | 200 | local  | neutral | 0.51 |
| Insch (2013)          | 26 | 45 | 33 | older | 72.8  | United Kingdom | 82 | predictive    | real      | 200 | local  | neutral | 0.09 |

<sup>1</sup>Post data reduction only. Where the post data reduction values were not available, not reported is specified. <sup>2</sup>task types are localization (local), categorization (categ) and detection (det).

### Supplement 4. P-Curve Disclosure Table

*p-Curve Disclosure Table for the selection rule “Extract the p-value associated with the first test of age-differences in gaze-cueing effects with a significant (< .05) p-value”*

| Citation                          | Stated Hypothesis (SH) <sup>1</sup>                                                                  | Study Design                                                                                                                                                                | Statistical Result Testing SH        | Statistical Result of Interest                                                                                                | Recomputed Precise p-value Based on Reported Test Statistics         | p-value for Inclusion in p-Curve |
|-----------------------------------|------------------------------------------------------------------------------------------------------|-----------------------------------------------------------------------------------------------------------------------------------------------------------------------------|--------------------------------------|-------------------------------------------------------------------------------------------------------------------------------|----------------------------------------------------------------------|----------------------------------|
| Bailey et al. (2014) Study 1      |                                                                                                      | 2 (age group: young, old) X 2 (cue validity: valid, invalid) x 2 (cue presentation: subliminal, supraliminal) x 2 (face age: old, young)                                    |                                      | “There was a congruity x participant age group interaction, $F(1, 60) = 5.41, p = .023, \eta_p^2 = .08$ ”                     | p-value associated with $F = 5.41$ for the $F(1, 60)$ distribution.  | 0.023                            |
| Bailey et al. (2014) Study 2      |                                                                                                      | 2 (age group: young, old) X 2 (cue validity: valid, invalid) x 2 (cue presentation: subliminal, supraliminal) x 2 (face age: old, young) x 2 (face emotion: happy, fearful) |                                      | “There were, however, participant age group x congruity, $F(1, 59) = 6.58, p = .013, \eta_p^2 = .10$ ”                        | p-value associated with $F = 6.58$ for the $F(1, 59)$ distribution.  | 0.013                            |
| Deroche et al. (2016)             |                                                                                                      | 2 (age group: young, old) x 2 (cue validity: valid, invalid) x 4 (SOAs: 100, 300, 600, 1000)                                                                                |                                      | No significant difference in gaze-cueing between older and younger adults was detected overall or at any of the four SOAs.    | na                                                                   |                                  |
| Gayzur et al. (2014) Experiment 1 | “We expected that validity effects would be at least as great for older adults as for young adults”. | 3 (age group: young, young-old, old-old) x 2 (cue validity: valid, invalid) x 4 (SOAs: 100, 300, 600, 1000)                                                                 | Age group x cue validity interaction | “Age differences in validity effects were observed at the 100-ms SOA, $F(2, 117) = 4.21, p = .017$ . SNK analyses showed that | p-value associated with $F = 4.21$ for the $F(2, 117)$ distribution. | 0.017                            |

|                                      |                                                                                                                                      |                                                                                                                                           |                                      |                                                                                                                                                       |                                                                         |           |
|--------------------------------------|--------------------------------------------------------------------------------------------------------------------------------------|-------------------------------------------------------------------------------------------------------------------------------------------|--------------------------------------|-------------------------------------------------------------------------------------------------------------------------------------------------------|-------------------------------------------------------------------------|-----------|
|                                      |                                                                                                                                      |                                                                                                                                           |                                      | at 100 ms, the young and young-old adults had greater validity effects than did the old-old adults.”                                                  |                                                                         |           |
| Gayzur et al. (2014)<br>Experiment 2 |                                                                                                                                      | 3 (age group: young, young-old, old-old) x 2 (cue validity: valid, invalid) x 4 (SOAs: 100, 300, 600, 1000)                               |                                      | “Significant age differences in the validity effect difference scores (invalid RT minus valid RT) were not found at any of the SOAs, all $F_s < 1$ .” | na                                                                      |           |
| Nagy et al. (2020)                   | “We assumed that older adults, as distinct from young adults, would not be able to ignore the effect of the task-irrelevant cues...” | 2 (age group: young, old) x 2 (cue validity: valid, invalid) x 2 (spatial simon condition: congruent, incongruent) x 2 (cue: face, patch) | Age group x cue validity interaction | Not assessed                                                                                                                                          | na                                                                      |           |
| Slessor et al. (2010)                |                                                                                                                                      | 2 (age group: young, old) x 2 (cue validity: valid, invalid) x 2 (cue face age: young, old)                                               |                                      | “There was also a significant Age of Participant x Cue Congruity interaction, $F(1, 56) = 7.891, p < .01, \eta_p^2 = .12$ .”                          | $p$ -value associated with $F = 7.89$ for the $F(1, 56)$ distribution.  | 0.007     |
| Slessor et al. (2008) Study 2        |                                                                                                                                      | 2 (age group: young, old) x 2 (cue validity: valid, invalid) x 5 (expression: neutral, happy, sad, fearful, angry)                        |                                      | “A significant Cue Congruity x Age interaction was found, $F(1, 80) = 29.98, p < .001, \eta_p^2 = .28$ .”                                             | $p$ -value associated with $F = 29.89$ for the $F(1, 80)$ distribution. | < 0.00001 |
| Slessor et al. (2016) Study 1        |                                                                                                                                      | 2 (age group: young, old) x 2 (cue validity: valid, invalid) x 2 (predictiveness: predictive, nonpredictive)                              |                                      | “These findings were qualified by a Cue-target congruency x Age group interaction,                                                                    | $p$ -value associated with $F = 10.78$ for the $F(1, 73)$ distribution. | 0.002     |

|                               |                                                                                                                                                                                                                               |                                                                      |                                      |                                                                                                                                    |                                                                          |             |
|-------------------------------|-------------------------------------------------------------------------------------------------------------------------------------------------------------------------------------------------------------------------------|----------------------------------------------------------------------|--------------------------------------|------------------------------------------------------------------------------------------------------------------------------------|--------------------------------------------------------------------------|-------------|
|                               |                                                                                                                                                                                                                               |                                                                      |                                      | $F(1,73) = 10.78, p < .01, \eta_p^2 = .13.$                                                                                        |                                                                          |             |
| Slessor et al. (2016) Study 2 |                                                                                                                                                                                                                               | 2 (age group: young, old) x 3 (cue validity: valid, invalid, no cue) |                                      | “This was qualified by a significant Cue-target congruency x Age group interaction $F(2,176) = 18.69, p < .001, \eta_p^2 = .18.$ ” | $p$ -value associated with $F = 18.69$ for the $F(2, 176)$ distribution. | $< 0.00001$ |
| Dalmaso et al. (2015)         |                                                                                                                                                                                                                               |                                                                      |                                      | No direct age comparisons.                                                                                                         | na                                                                       |             |
| Insch (2013) Chapter 7        | “It is hypothesised that older adults in the current research would also follow gaze cues but to a lesser extent than the younger adults as indexed by a significantly smaller gaze congruity effect than the younger group.” | 2 (age group: young, old) x 2 (cue validity: valid, invalid)         | Age group x cue validity interaction | “A gaze direction x age category interaction was revealed, $F(1, 83) = 19.25, p < 0.001, \eta_p^2 = .18.$ ”                        | $p$ -value associated with $F = 19.25$ for the $F(1, 83)$ distribution.  | 0.00003     |

<sup>1</sup>If there is not SH associated with the first test of age-differences in gaze-cueing effects with a significant ( $< .05$ )  $p$ -value, cells in this table related to SH are left blank.
